## RETRACTION

## Retraction: Acute Toxicity and Gastroprotection Studies of a New Schiff Base Derived Copper (II) Complex against Ethanol-Induced Acute Gastric Lesions in Rats

The *PLOS ONE* Editors

Following the publication of this article [1], concerns were raised regarding reuse of results presented in Figures 2, 7, 9, and 10. Specifically,

- Figure 2B presented in this article [1] appears similar to the Control panel in Figure 2 of [2]\*, and Figure 1d of [3].
- Figure 7B presented in this article [1] appears similar to Figure 5 of [4]\*.
- Figure 7G of this article [1] appears similar to the following results, despite being used to represent different experimental conditions:
  - Fig. 2a of [5], when rotated
  - Figure 2a of [6, corrected in 7]
  - Figure 3 panel G1 of [8, retracted in 9], when rotated
- Figure 8F presented in this article [1] appears to partially overlap with Fig. 4D of [10, retracted in 11] when rotated.
- Figure 9F presented in this article [1] appears similar to Figure 5 panel G7 of [8, retracted in 9], despite being used to represent different experimental conditions
- Figure 10A presented in this article [1] appears similar to Figure 10G presented in this article [1] and Fig. 5A of [12, retracted in 13], despite being used to represent different experimental conditions
- Figure 10D presented in this article [1] appears similar to Fig. 4D of [14], despite being used to represent different experimental conditions

Some of the similar (or reused) images were used to represent controls in these articles, but different methodological details were reported for the indicated experiments in the articles' Materials and Methods sections. Given the nature and extent of the issues, the *PLOS ONE* Editors are concerned about the reliability of data management and/or reporting for this study [1].

Following editorial communication regarding these concerns, one of the co-authors requested retraction of the article. The original data underlying this study were not provided for editorial review.

In light of the above concerns, the *PLOS ONE* Editors retract this article.

Some figure panels discussed above appear to report previously published material that are offered under a CC BY license, but the original article(s) was/were not attributed in [1]. For

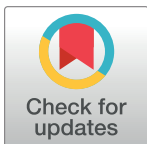

## OPEN ACCESS

**Citation:** The *PLOS ONE* Editors (2023) Retraction: Acute Toxicity and Gastroprotection Studies of a New Schiff Base Derived Copper (II) Complex against Ethanol-Induced Acute Gastric Lesions in Rats. *PLoS ONE* 18(11): e0294016. <https://doi.org/10.1371/journal.pone.0294016>

**Published:** November 10, 2023

**Copyright:** © 2023 The *PLOS ONE* Editors. This is an open access article distributed under the terms of the [Creative Commons Attribution License](https://creativecommons.org/licenses/by/4.0/), which permits unrestricted use, distribution, and reproduction in any medium, provided the original author and source are credited.

these images, the \* by the citation, above, marks the oldest publication of the image of which PLOS is aware.

SG, PH, NM, and MAA agreed with the retraction. MH responded but expressed neither agreement nor disagreement with the editorial decision. NSG, AHAAH, and HMA either did not respond directly or could not be reached. SG and NM apologize for the issues with the published article. MAA stands by the article's findings.

## References

- Hajrezaie M, Golbabapour S, Hassandarvish P, Gwaram NS, A. Hadi AH, Mohd Ali H, et al. (2012) Acute Toxicity and Gastroprotection Studies of a New Schiff Base Derived Copper (II) Complex against Ethanol-Induced Acute Gastric Lesions in Rats. *PLoS ONE* 7(12): e51537. <https://doi.org/10.1371/journal.pone.0051537> PMID: 23251568
- Amin ZA, Bilgen M, Alshawsh MA, Ali HM, A Hadi AH, and Abdulla MA (2012) Protective Role of *Phyllanthus niruri* Extract against Thioacetamide-Induced Liver Cirrhosis in Rat Model. *Evidence-Based Complementary and Alternative Medicine*, Volume 2012, Article ID 241583. <https://doi.org/10.1155/2012/241583> PMID: 22649471
- Al Batran R, Al-Bayaty F, Al-Obaidi MMJ, and Abdulla MA (2013) Acute Toxicity and the Effect of Andrographolide on *Porphyromonas gingivalis*-Induced Hyperlipidemia in Rats. *BioMed Research International*, Volume 2013, Article ID 594012. <https://doi.org/10.1155/2013/594012> PMID: 23844365
- Mughrabi FF, Hashim H, Ameen M, Khaledi H, and Ali HM (2011) Cytoprotective effect of Benzyl N'-(indol-3-ylmethylidene)-hydrazinecarbodithioate against ethanol-induced gastric mucosal injury in rats. *African Journal of Pure and Applied Chemistry*, 5(3) 34–42. <https://academicjournals.org/journal/AJPAC/article-full-text-pdf/434383E2449>
- Al Batran R, Abdulla MA, Al-Obaidi MMJ, Hajrezaie M, Hassandarvish P, Fouad M, et al (2013) Gastroprotective effects of *Corchorus olitorius* leaf extract against ethanol-induced gastric mucosal hemorrhagic lesions in rats. *Journal of Gastroenterology and Hepatology*, 28(8): 1321–1329. <https://doi.org/10.1111/jgh.12229> PMID: 23611708
- Ismail IF, Golbabapour S, Hassandarvish P, Hajrezaie M, Majid NA, Kadir FA, et al. (2012) Gastroprotective Activity of *Polygonum chinense* Aqueous Leaf Extract on Ethanol-Induced Hemorrhagic Mucosal Lesions in Rats. *Evidence-Based Complementary and Alternative Medicine*, Volume 2012, Article ID 404012. <https://doi.org/10.1155/2012/404012> PMID: 23365597
- Ismail IF, Golbabapour S, Hassandarvish P, Hajrezaie M, Majid NA, Kadir FA, et al. (2018) Corrigendum to "Gastroprotective Activity of Polygonum chinense Aqueous Leaf Extract on Ethanol-Induced Hemorrhagic Mucosal Lesions in Rats". *Evidence-Based Complementary and Alternative Medicine*, Volume 2018, Article ID 8961462. <https://doi.org/10.1155/2018/8961462> PMID: 30647764
- Al Batran R, Al-Bayaty F, Jamil Al-Obaidi MM, Abdulkader AM, Hadi HA, Ali HM, et al. (2013) In Vivo Antioxidant and Antiulcer Activity of *Parkia speciosa* Ethanolic Leaf Extract against Ethanol-Induced Gastric Ulcer in Rats. *PLoS ONE* 8(5): e64751. <https://doi.org/10.1371/journal.pone.0064751> PMID: 23724090
- The *PLOS ONE* Editors (2023) Retraction: In Vivo Antioxidant and Antiulcer Activity of *Parkia speciosa* Ethanolic Leaf Extract against Ethanol-Induced Gastric Ulcer in Rats. *PLoS ONE* 18(11): e0294012.
- Hajrezaie M, Salehen N, Karimian H, Zahedifard M, Shams K, Batran RA, et al. (2015) Biochanin A Gastroprotective Effects in Ethanol-Induced Gastric Mucosal Ulceration in Rats. *PLoS ONE* 10(3): e0121529. <https://doi.org/10.1371/journal.pone.0121529> PMID: 25811625
- The *PLOS ONE* Editors (2023) Retraction: Biochanin A Gastroprotective Effects in Ethanol-Induced Gastric Mucosal Ulceration in Rats. *PLoS ONE* 18(11): e0294005.
- Sidahmed HMA, Hashim NM, Abdulla MA, Ali HM, Mohan S, Abdelwahab SI, et al. (2015) Antisecretory, Gastroprotective, Antioxidant and Anti-*Helicobacter Pylori* Activity of Zerumbone from *Zingiber Zerumbet* (L.) Smith. *PLoS ONE* 10(3): e0121060. <https://doi.org/10.1371/journal.pone.0121060> PMID: 25798602
- The *PLOS ONE* Editors (2023) Retraction: Antisecretory, Gastroprotective, Antioxidant and Anti-*Helicobacter Pylori* Activity of Zerumbone from *Zingiber Zerumbet* (L.) Smith. *PLoS ONE* 18(11): e0294009.
- Mariod AA, Jabbar AAJ, Alamri ZZ, S Rashdi A, and Abdulla MA (2023) Gastroprotective effects of *Polygonatum odoratum* in rodents by regulation of apoptotic proteins and inflammatory cytokines. *Saudi Journal of Biological Sciences*, 30(6). <https://doi.org/10.1016/j.sjbs.2023.103678> PMID: 37266408
